# Supplementary material for: Association of APOE e2 genotype with Alzheimer’s and non-Alzheimer’s neurodegenerative pathologies
Source: PubMed Central journal article supplement (PMC7501268; doi:10.1038/s41467-020-18198-x), 2020-09-18
Supplement: 41467_2020_18198_MOESM1_ESM.pdf [file 41467_2020_18198_MOESM1_ESM.pdf]

Association of APOE e2 Genotype with Alzheimer's and Non-Alzheimer's Neurodegenerative Pathologies

Goldberg et al.

**Supplementary Information**

**Supplementary Table 1  
APOE Genotype by PLAQUE THAL STAGE**

| <b>Frequency</b> | <b>APOE Genotype</b> | <b>NPTHAL(NPTHAL)</b> |          |          |          |          |          | <b>Total</b> |
|------------------|----------------------|-----------------------|----------|----------|----------|----------|----------|--------------|
|                  |                      | <b>0</b>              | <b>1</b> | <b>2</b> | <b>3</b> | <b>4</b> | <b>5</b> |              |
|                  | <b>E2</b>            | 48                    | 14       | 8        | 17       | 16       | 27       | 130          |
|                  | <b>E3/E3</b>         | 133                   | 75       | 60       | 90       | 145      | 250      | 753          |
|                  | <b>E3/E4</b>         | 14                    | 25       | 25       | 61       | 109      | 301      | 535          |
|                  | <b>E4/E4</b>         | 3                     | 1        | 3        | 5        | 20       | 107      | 139          |
|                  | <b>Total</b>         | 198                   | 115      | 96       | 173      | 290      | 685      | 1557         |

**Statistics for Table 1: APOE Genotype by NPTHAL**

| <b>Statistic</b>  | <b>DF</b> | <b>Value</b> | <b>Prob</b> |
|-------------------|-----------|--------------|-------------|
| <b>Chi-Square</b> | 15        | 263.2261     | <.0001      |

**Supplementary Table 2  
APOE Genotype by BRAAK STAGE**

| <b>Frequency</b> | <b>APOE Genotype</b> | <b>BRAAK STAGE</b> |          |          |          |          |          |          | <b>Total</b> |
|------------------|----------------------|--------------------|----------|----------|----------|----------|----------|----------|--------------|
|                  |                      | <b>0</b>           | <b>1</b> | <b>2</b> | <b>3</b> | <b>4</b> | <b>5</b> | <b>6</b> |              |
|                  | <b>E2</b>            | 19                 | 17       | 15       | 27       | 15       | 12       | 25       | 130          |
|                  | <b>E3/E3</b>         | 53                 | 78       | 100      | 84       | 94       | 130      | 214      | 753          |
|                  | <b>E3/E4</b>         | 11                 | 28       | 22       | 44       | 52       | 112      | 266      | 535          |
|                  | <b>E4/E4</b>         | 0                  | 2        | 2        | 2        | 6        | 30       | 97       | 139          |
|                  | <b>Total</b>         | 83                 | 125      | 139      | 157      | 167      | 284      | 602      | 1557         |

**Statistics for Table 2: APOE Genotype by NACC BRAAK STAGE**

| <b>Statistic</b>  | <b>DF</b> | <b>Value</b> | <b>Prob</b> |
|-------------------|-----------|--------------|-------------|
| <b>Chi-Square</b> | 18        | 234.6745     | <.0001      |

**Supplementary Table 3**  
**APOE Genotype by NEURITIC PLAQUE FREQUENCY (# cases)**

| Frequency | APOE Genotype | NEURITIC PLAQUE STAGE |     |     |     | Total |
|-----------|---------------|-----------------------|-----|-----|-----|-------|
|           |               | 0                     | 1   | 2   | 3   |       |
|           | <b>E2</b>     | 61                    | 13  | 19  | 37  | 130   |
|           | <b>E3/E3</b>  | 231                   | 78  | 154 | 290 | 753   |
|           | <b>E3/E4</b>  | 51                    | 34  | 108 | 342 | 535   |
|           | <b>E4/E4</b>  | 5                     | 5   | 20  | 109 | 139   |
|           | <b>Total</b>  | 348                   | 130 | 301 | 778 | 1557  |

**Statistics for Table 3: APOE Genotype by NEURITIC PLAQUE**

| Statistic  | DF | Value    | Prob   |
|------------|----|----------|--------|
| Chi-Square | 9  | 209.1753 | <.0001 |

**Supplementary Table 4. Independent Age and Sex Effects on AD Neuropathologies**

|                               |     | <b>Wald</b> | <b>p</b> | <b>Point Estimate</b> | <b>CI</b>   |
|-------------------------------|-----|-------------|----------|-----------------------|-------------|
| <b><u>Braak</u></b>           | Age | 2.39        | .12      | .99                   | .98 – 1.00  |
| <b>e2 v e3</b>                | Sex | 5.59        | .02      | .75                   | .59 – .95   |
| <b><u>Braak</u></b>           | Age | 5.57        | .02      | 1.02                  | 1.00 – 1.03 |
| <b>e2 v e4</b>                | Sex | 4.12        | .04      | .76                   | .58 – .99   |
| <b><u>Thal</u></b>            | Age | 1.09        | .29      | .99                   | .99 – 1.01  |
| <b>e2 v e3</b>                | Sex | 4.08        | .04      | .78                   | .62 – .99   |
| <b><u>Thal</u></b>            | Age | .17         | .67      | .99                   | .98 – 1.01  |
| <b>e2 v e4</b>                | Sex | 4.51        | .03      | .76                   | .39 – .77   |
| <b><u>Neuritic Plaque</u></b> | Age | .17         | .68      | 1.00                  | .59 – 1.01  |
| <b>e2 v e3</b>                | Sex | 4.50        | .03      | .77                   | .60 – .98   |
| <b><u>Neuritic Plaque</u></b> | Age | 9.51        | .002     | 1.02                  | 1.01 – 1.04 |
| <b>e2 v e4</b>                | Sex | 2.63        | .10      | .79                   | .59 – 1.05  |

**Supplementary Table 5  
APOE e2/e4 by BRAAK STAGE**

| <b>Frequency</b> | <b>APOE</b> | <b>BRAAK STAGE</b> |          |          |          |          |          |      | <b>Total</b> |
|------------------|-------------|--------------------|----------|----------|----------|----------|----------|------|--------------|
|                  | <b>0</b>    | <b>1</b>           | <b>2</b> | <b>3</b> | <b>4</b> | <b>5</b> | <b>6</b> |      |              |
| <b>E2/E3</b>     | 19          | 17                 | 15       | 26       | 15       | 12       | 23       | 127  |              |
| <b>E2/E4</b>     | 0           | 0                  | 5        | 3        | 4        | 12       | 22       | 46   |              |
| <b>E3/E3</b>     | 52          | 77                 | 99       | 84       | 92       | 128      | 210      | 742  |              |
| <b>E3/E4</b>     | 11          | 28                 | 22       | 41       | 52       | 106      | 258      | 518  |              |
| <b>Total</b>     | 82          | 122                | 141      | 154      | 163      | 258      | 513      | 1433 |              |

**Statistics for Table 5: APOE e2/e4 by NACCBRAA**

| <b>Statistic</b>  | <b>DF</b> | <b>Value</b> | <b>Prob</b> |
|-------------------|-----------|--------------|-------------|
| <b>Chi-Square</b> | 18        | 157.7241     | <.0001      |

**Supplementary Table 6**  
**APOE e2/e4 by NEURITIC PLAQUE**

|                  |              | <b>NEURITIC PLAQUE</b> |          |          |          |              |
|------------------|--------------|------------------------|----------|----------|----------|--------------|
|                  |              | <b>0</b>               | <b>1</b> | <b>2</b> | <b>3</b> | <b>Total</b> |
| <b>Frequency</b> | <b>E2/E3</b> | 61                     | 13       | 18       | 35       | 127          |
|                  | <b>E2/E4</b> | 3                      | 4        | 11       | 28       | 46           |
|                  | <b>E3/E3</b> | 228                    | 78       | 150      | 286      | 742          |
|                  | <b>E3/E4</b> | 51                     | 34       | 106      | 327      | 518          |
|                  | <b>Total</b> | 343                    | 129      | 285      | 676      | 1433         |

**Statistics for Table 6: APOE e2/e4 by NEURITIC PLAQUE**

| <b>Statistic</b>  | <b>DF</b> | <b>Value</b> | <b>Prob</b> |
|-------------------|-----------|--------------|-------------|
| <b>Chi-Square</b> | 9         | 153.8538     | <.0001      |

**Supplementary Table 7. APOE e2/e4 by THAL AMYLOID**

| <b>APOE</b>      |              | <b>0</b> | <b>1</b> | <b>2</b> | <b>3</b> | <b>4</b> | <b>5</b> | <b>Total</b> |
|------------------|--------------|----------|----------|----------|----------|----------|----------|--------------|
| <b>Frequency</b> |              |          |          |          |          |          |          |              |
|                  | <b>E2/E3</b> | 48       | 13       | 8        | 17       | 16       | 25       | 127          |
|                  | <b>E2/E4</b> | 2        | 2        | 3        | 3        | 13       | 23       | 46           |
|                  | <b>E3/E3</b> | 131      | 74       | 60       | 90       | 141      | 246      | 742          |
|                  | <b>E3/E4</b> | 14       | 25       | 25       | 60       | 103      | 291      | 518          |
|                  | <b>Total</b> | 195      | 114      | 96       | 170      | 273      | 585      | 1433         |

**Statistics for Table 7: APOE e2/e4 by THAL**

| <b>Statistic</b>  | <b>DF</b> | <b>Value</b> | <b>Prob</b> |
|-------------------|-----------|--------------|-------------|
| <b>Chi-Square</b> | 15        | 190.2329     | <.0001      |



**Supplementary Table 8**  
**APOE Genotype by LEWY BODY EXTENT**

| Frequency | APOE<br>Genotype | LEWY) |    |     |     | Total |
|-----------|------------------|-------|----|-----|-----|-------|
|           |                  | 0     | 1  | 2   | 3   |       |
|           | <b>E2</b>        | 88    | 15 | 21  | 9   | 133   |
|           | <b>E3/E3</b>     | 543   | 30 | 121 | 78  | 772   |
|           | <b>E3/E4</b>     | 319   | 15 | 120 | 81  | 535   |
|           | <b>E4/E4</b>     | 65    | 2  | 45  | 30  | 142   |
|           | <b>Total</b>     | 1015  | 62 | 307 | 198 | 1582  |

**Statistics for Table 8: APOE Genotype by LEWY BODY EXTENT**

| Statistic         | DF | Value   | Prob   |
|-------------------|----|---------|--------|
| <b>Chi-Square</b> | 9  | 74.6915 | <.0001 |

**Supplementary Table 9. Age and Sex Effects on Lewy Body Pathology**

|                         |     | <b>Wald</b> | <b>p</b> | <b>Point Est.</b> | <b>CI</b>  |
|-------------------------|-----|-------------|----------|-------------------|------------|
| <b><u>Lewy Body</u></b> | Age | .09         | .77      | 1.00              | .99 – 1.01 |
| <b>e2 v e3</b>          | Sex | 3.52        | .06      | .76               | .57 – 1.01 |
|                         | Age | 2.74        | .10      | .99               | .98 – 1.00 |
| <b>e2 v e4</b>          | Sex | .25         | .61      | .93               | .70 – 1.23 |

**Supplementary Table 10. APOE by TDP-43**

|                  | <b>APOE</b>  | <b>TDP-43</b> |          |              |
|------------------|--------------|---------------|----------|--------------|
|                  |              | <b>0</b>      | <b>1</b> | <b>Total</b> |
| <b>Frequency</b> | <b>E2</b>    | 90            | 17       | 107          |
| <b>Percent</b>   |              | 7.20          | 1.36     | 8.56         |
| <b>Row Pct</b>   |              | 84.11         | 15.89    |              |
| <b>Col Pct</b>   |              | 7.85          | 16.50    |              |
|                  | <b>E3/E3</b> | 550           | 54       | 604          |
|                  |              | 44.00         | 4.32     | 48.32        |
|                  |              | 91.06         | 8.94     |              |
|                  |              | 47.95         | 52.43    |              |
|                  | <b>E3/E4</b> | 404           | 27       | 431          |
|                  |              | 32.32         | 2.16     | 34.48        |
|                  |              | 93.74         | 6.26     |              |
|                  |              | 35.22         | 26.21    |              |
|                  | <b>E4/E4</b> | 103           | 5        | 108          |
|                  |              | 8.24          | 0.40     | 8.64         |
|                  |              | 95.37         | 4.63     |              |
|                  |              | 8.98          | 4.85     |              |
|                  | <b>Total</b> | 1147          | 103      | 1250         |
|                  |              | 91.76         | 8.24     | 100.00       |

**Frequency Missing = 227**

**Supplementary Table 11. APOE by PSP**

|                  |              | APOE  |       | PSP    |       |
|------------------|--------------|-------|-------|--------|-------|
|                  |              |       | 0     | 1      | Total |
| <b>Frequency</b> | <b>E2</b>    | 97    | 10    | 107    |       |
| <b>Percent</b>   |              | 7.76  | 0.80  | 8.56   |       |
| <b>Row Pct</b>   |              | 90.65 | 9.35  |        |       |
| <b>Col Pct</b>   |              | 8.09  | 19.61 |        |       |
|                  | <b>E3/E3</b> | 576   | 28    | 604    |       |
|                  |              | 46.08 | 2.24  | 48.32  |       |
|                  |              | 95.36 | 4.64  |        |       |
|                  |              | 48.04 | 54.90 |        |       |
|                  | <b>E3/E4</b> | 421   | 10    | 431    |       |
|                  |              | 33.68 | 0.80  | 34.48  |       |
|                  |              | 97.68 | 2.32  |        |       |
|                  |              | 35.11 | 19.61 |        |       |
|                  | <b>E4/E4</b> | 105   | 3     | 108    |       |
|                  |              | 8.40  | 0.24  | 8.64   |       |
|                  |              | 97.22 | 2.78  |        |       |
|                  |              | 8.76  | 5.88  |        |       |
|                  | <b>Total</b> | 1199  | 51    | 1250   |       |
|                  |              | 95.92 | 4.08  | 100.00 |       |

**Frequency Missing = 227**

**Supplementary Table 12. APOE by Pick's B0dy Pathology**

|                  |              | <b>APOE</b> |          | <b>Pick</b> | <b>Total</b> |
|------------------|--------------|-------------|----------|-------------|--------------|
|                  |              | <b>0</b>    | <b>1</b> |             |              |
| <b>Frequency</b> | <b>E2</b>    | 103         | 4        |             | 107          |
| <b>Percent</b>   |              | 8.24        | 0.32     |             | 8.56         |
| <b>Row Pct</b>   |              | 96.26       | 3.74     |             |              |
| <b>Col Pct</b>   |              | 8.41        | 16.00    |             |              |
|                  | <b>E3/E3</b> | 586         | 18       |             | 604          |
|                  |              | 46.88       | 1.44     |             | 48.32        |
|                  |              | 97.02       | 2.98     |             |              |
|                  |              | 47.84       | 72.00    |             |              |
|                  | <b>E3/E4</b> | 428         | 3        |             | 431          |
|                  |              | 34.24       | 0.24     |             | 34.48        |
|                  |              | 99.30       | 0.70     |             |              |
|                  |              | 34.94       | 12.00    |             |              |
|                  | <b>E4/E4</b> | 108         | 0        |             | 108          |
|                  |              | 8.64        | 0.00     |             | 8.64         |
|                  |              | 100.00      | 0.00     |             |              |
|                  |              | 8.82        | 0.00     |             |              |
|                  | <b>Total</b> | 1225        | 25       |             | 1250         |
|                  |              | 98.00       | 2.00     |             | 100.00       |

**Frequency Missing = 227**
